# Supplementary material
Source: publisher figshare collection journal article supplement (https://frontiersin.figshare.com/ndownloader/files/31010662)
Supplement: Supplementary file [file 31010662]

## Supplementary file

### 1. *The quality control of PNS*

We analyzed PNS by HPLC. Reference compounds were purchased from Desite Bio-tech Co. Ltd. (Chengdou, China). Notoginsenoside R<sub>1</sub> (Batch No: DST210415-050, Purity HPLC  $\geq$  98.0%), ginsenoside Rg<sub>1</sub> (Batch No: DSTDR000901, Purity HPLC  $\geq$  98.0%), ginsenoside Rb<sub>1</sub> (Batch No: DSTdr000601, Purity HPLC  $\geq$  98.0%), ginsenoside Rd (Batch No: DSTDR001501, Purity HPLC  $\geq$  98.0%). The standards and *P.notoginseng* saponin were dissolved in methanol, and the concentrations were 5 mg/mL and 20 mg/mL, respectively. We used Agilent SB-C18 column (250 × 4.6 mm, 5  $\mu$ m, 30°C, UV detection is  $\lambda$ =203 nm, flow rate =1.5ml/min.), and determined the main components of PNS based on the HPLC chromatograms of standards and *P.notoginseng* saponis (Fig.S1).

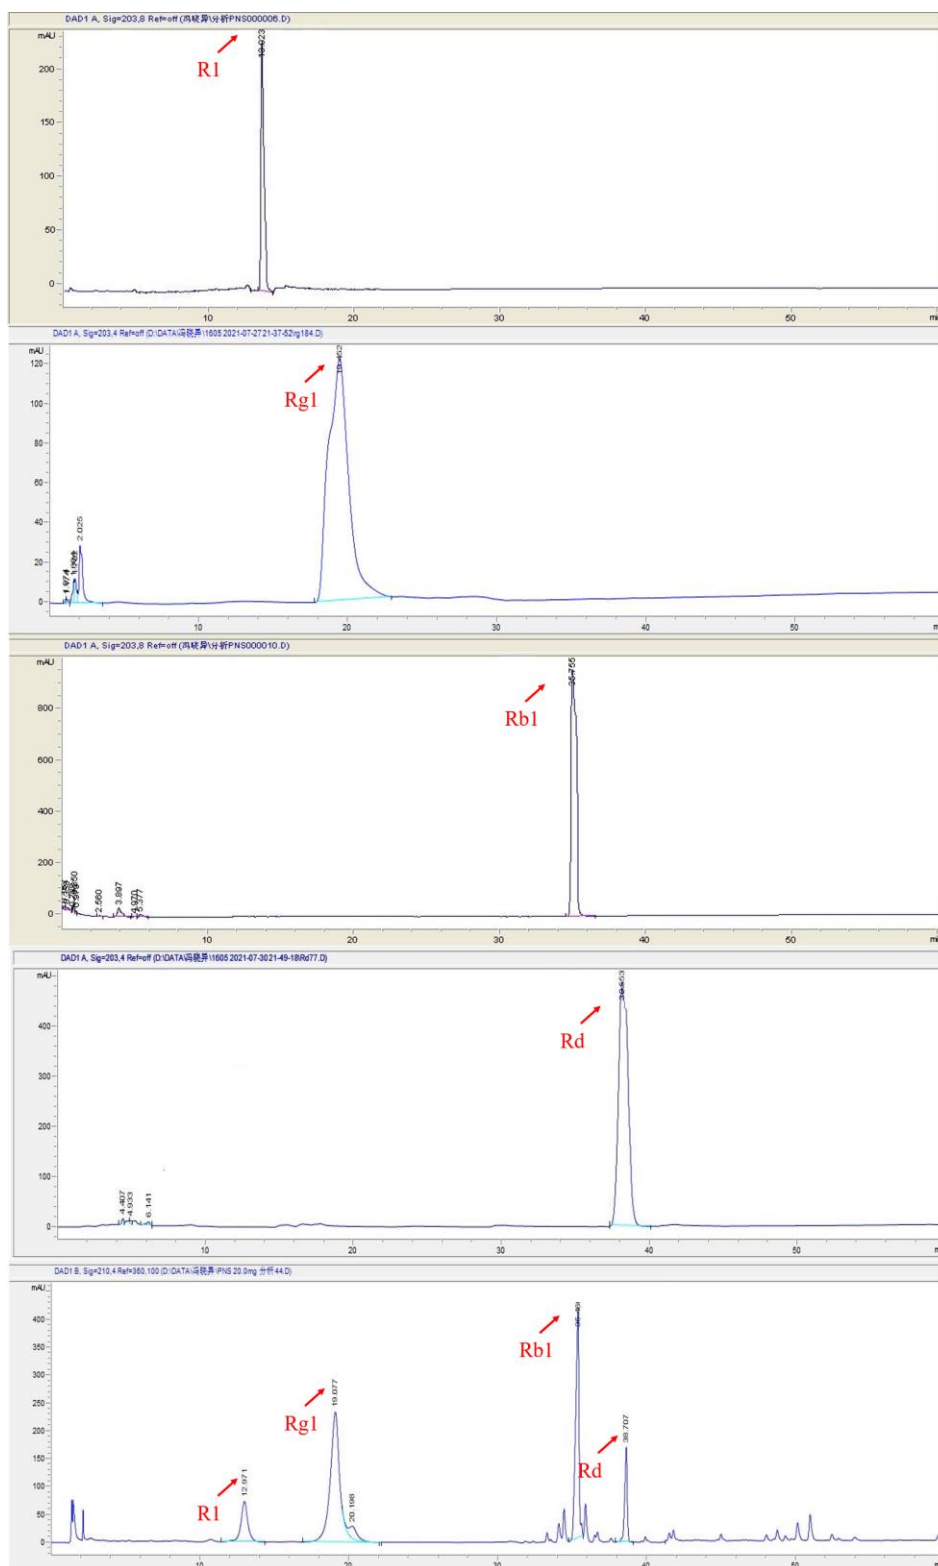

**Fig.S1.** Representative HPLC chromatogram of standards and *Panax notoginseng* saponin.

Notoginsenoside R<sub>1</sub> (tr = 12.923 min), ginsenoside Rg<sub>1</sub> (tr = 19.452 min), ginsenoside Rb<sub>1</sub> (tr = 35.755 min), ginsenoside Rd (tr = 38.707 min). HPLC chromatogram was authenticated according to the Pharmacopoeia of the People's Republic of China identification key (2020, Volume 1). Column: Agilent SB-C18, 250 × 4.6 mm, 5 μm; Column temperature: 25°C; Flow rate = 1.5 ml/min; UV

detection is  $\lambda=203$  nm. Gradient elution: acetonitrile (A) and Water (B): t 0min 20% A, t 20 min 20% A, t 45 min 46% A, t 55 min 55% A, 60 min 55% A. Injection volume: 10  $\mu\text{L}$ .

## 2. *MTT assay*

HepG2 ( $1 \times 10^4$  cells/well) were incubated in 96-well plates in complete DMEM. Cells were treated with different concentrations of sorafenib (0, 0.63, 1.25, 2.5, 5, 10, 20  $\mu\text{mol} \cdot \text{L}^{-1}$ ) for 48 h. Cell viability was determined by MTT assay. Added 20  $\mu\text{L}$  MTT to each well and incubated for 3 h. The formazan was dissolved in 150  $\mu\text{L}$  of dimethyl sulfoxide (DMSO). Optical density was measured at 490 nm and cell viability was normalized as the percentage of control. Cell viability (%) =  $(\text{OD}_{\text{control}} - \text{OD}_{\text{sample}}) / (\text{OD}_{\text{control}} - \text{OD}_{\text{blank}}) \times 100\%$ .  $\text{IC}_{50}$  (half maximal inhibitory concentration) is calculated by SPSS software. The  $\text{IC}_{50}$  was  $13.09 \pm 0.83 \mu\text{mol} \cdot \text{L}^{-1}$ .

**Table S1** Effects of sorafenib on cell viability of HepG2 cells ( $\bar{x} \pm s$ ,  $n=3$ )

| Group                                                    | Concentration<br>( $\mu\text{mol} \cdot \text{L}^{-1}$ ) | Cell viability<br>(%) |
|----------------------------------------------------------|----------------------------------------------------------|-----------------------|
| control                                                  | -                                                        | $100.00 \pm 1.88$     |
| Sorafenib                                                | 0.625                                                    | $100.99 \pm 4.21$     |
|                                                          | 1.25                                                     | $93.34 \pm 3.65$      |
|                                                          | 2.5                                                      | $77.82 \pm 1.68$      |
|                                                          | 5                                                        | $75.49 \pm 3.41$      |
|                                                          | 10                                                       | $55.56 \pm 5.62$      |
|                                                          | 20                                                       | $40.12 \pm 0.21$      |
| $\text{IC}_{50}$ ( $\mu\text{mol} \cdot \text{L}^{-1}$ ) |                                                          | $13.09 \pm 0.83$      |
